# Supplementary material for: Integrative Genomics Identifies Distinct Molecular Classes of Neuroblastoma and Shows That Multiple Genes Are Targeted by Regional Alterations in DNA Copy Number
Source: Oxford University Press journal article supplement (doi:10.1158/0008-5472.can-05-4618), 2006-06-15
Supplement: 00085472can054618-sup-supplementary_table_1.xls [file 00085472can054618-sup-supplementary_table_1.xls]

## Sheet: Sheet1
G1 Biological Processes (List Total = 516, Population Total = 1219)
GO Category	List Hits	Population Hits	p-value
metabolism	395	726	6.30463e-26
protein biosynthesis	80	93	1.55624e-19
macromolecule biosynthesis	101	135	4.86584e-16
biosynthesis	112	156	1.53873e-15
nucleobase\, nucleoside\, nucleotide and nucleic acid metabolism	188	307	9.40389e-15
nucleobase, nucleoside, nucleotide and nucleic acid metabolism	188	311	6.78064e-14
RNA metabolism	56	70	3.83003e-11
RNA processing	51	63	1.39772e-10
mRNA metabolism	38	44	9.98914e-10
mRNA processing	32	37	2.24359e-08
DNA metabolism	56	79	1.08317e-07
protein metabolism	165	303	6.48299e-07
RNA splicing	27	32	9.03079e-07
RNA splicing, via transesterification reactions with bulged adenosine as nucleophile	22	25	2.39744e-06
RNA splicing, via transesterification reactions	22	25	2.39744e-06
nuclear mRNA splicing, via spliceosome	22	25	2.39744e-06
mitotic cell cycle	44	62	2.76836e-06
translation	29	37	6.42103e-06
cell cycle	69	112	1.29843e-05
M phase	21	26	6.11658e-05
DNA replication and chromosome cycle	25	33	8.19714e-05
regulation of biosynthesis	18	22	0.00015976
nuclear division	19	24	0.000232951
response to DNA damage stimulus	17	21	0.000316686
response to endogenous stimulus	17	21	0.000316686
DNA replication	22	30	0.000500513
S phase of mitotic cell cycle	22	30	0.000500513
DNA repair	13	15	0.000506388
regulation of metabolism	99	185	0.000587512
regulation of protein biosynthesis	16	20	0.000621063
regulation of translation	16	20	0.000621063
mitosis	17	22	0.000850234
M phase of mitotic cell cycle	17	22	0.000850234
nuclear mRNA splicing\, via spliceosome	8	8	0.00099881
RNA splicing\, via transesterification reactions with bulged adenosine as nucleophile	8	8	0.00099881
spliceosome assembly	8	8	0.00099881
translational elongation	8	8	0.00099881
RNA splicing\, via transesterification reactions	8	8	0.00099881
regulation of physiological process	101	192	0.00116508
translational initiation	15	19	0.00120381
chromosome organization and biogenesis (sensu Eukarya)	26	39	0.00160489
regulation of translational initiation	13	16	0.00166026
nuclear organization and biogenesis	27	41	0.00172371
physiological process	464	1058	0.00339206
transcription, DNA-dependent	82	156	0.00378949
transcription	88	169	0.00385037
G1 Cellular Components (List Total = 485, Population Total = 1149)
GO Category	List Hits	Population Hits	p-value
intracellular	415	783	5.86792e-29
ribonucleoprotein complex	76	79	1.66091e-26
nucleus	225	370	1.35942e-18
ribosome	45	46	1.13852e-16
cytosolic ribosome (sensu Eukarya)	28	28	2.04536e-11
inner membrane	27	27	5.01069e-11
cytosol	58	77	1.07908e-09
mitochondrion	59	81	7.12724e-09
mitochondrial inner membrane	18	18	1.50326e-07
eukaryotic 43S preinitiation complex	18	18	1.50326e-07
large ribosomal subunit	18	18	1.50326e-07
chromosome	36	46	4.15676e-07
cytosolic large ribosomal subunit (sensu Eukarya)	16	16	8.784e-07
cytoplasm	249	500	3.22452e-06
chromatin	25	30	3.50678e-06
mitochondrial membrane	23	27	4.24456e-06
small ribosomal subunit	13	13	1.22919e-05
eukaryotic 48S initiation complex	12	12	2.95473e-05
cytosolic small ribosomal subunit (sensu Eukarya)	12	12	2.95473e-05
proteasome complex (sensu Eukarya)	14	15	4.69367e-05
spliceosome complex	11	12	0.000526241
cell	448	1020	0.000554491
obsolete cellular component	35	55	0.000851923
mitochondrial electron transport chain	7	7	0.00232817
heterogeneous nuclear ribonucleoprotein complex	7	7	0.00232817
G1 Molecular Functions (List Total = 519, Population Total = 1238)
GO Category	List Hits	Population Hits	p-value
nucleic acid binding	219	327	1.12949e-26
RNA binding	106	128	1.33128e-23
structural constituent of ribosome	45	45	3.22452e-18
DNA binding	113	193	3.13141e-07
translation factor activity\, nucleic acid binding	21	23	8.7187e-07
translation factor activity, nucleic acid binding	21	23	8.7187e-07
translation regulator activity	21	23	8.7187e-07
pre-mRNA splicing factor activity	17	18	3.59998e-06
mRNA binding	22	26	7.82347e-06
hydrogen ion transporter activity	29	39	3.10828e-05
translation initiation factor activity	16	18	4.56483e-05
heme-copper terminal oxidase activity	11	11	6.60581e-05
oxidoreductase activity\, acting on heme group of donors\, oxygen as acceptor	11	11	6.60581e-05
oxidoreductase activity, acting on heme group of donors, oxygen as acceptor	11	11	6.60581e-05
oxidoreductase activity\, acting on heme group of donors	11	11	6.60581e-05
oxidoreductase activity, acting on heme group of donors	11	11	6.60581e-05
cytochrome-c oxidase activity	11	11	6.60581e-05
monovalent inorganic cation transporter activity	29	41	0.000143065
ATP-dependent helicase activity	14	17	0.000741625
DNA-dependent ATPase activity	8	8	0.000924426
primary active transporter activity	30	46	0.00099838
helicase activity	15	19	0.00106682
ion transporter activity	32	51	0.00179442
Supplemental Table 1. GO categories significantly enriched in gene cluster 1 (G1). All GO terms significantly enriched in G1 based on a one-sided Fisher's Exact test with a global (bootstrap) FDR < 0.05 are listed. Population Total: Number of genes in the filtered list of 2177 probe sets annotated to at least one GO category within the specific system (Biological Process/Cellular Component/Molecu…
