# Supplementary material for: Integrative Genomics Identifies Distinct Molecular Classes of Neuroblastoma and Shows That Multiple Genes Are Targeted by Regional Alterations in DNA Copy Number
Source: Oxford University Press journal article supplement (doi:10.1158/0008-5472.can-05-4618), 2006-06-15
Supplement: 00085472can054618-sup-supplementary_table_2.xls [file 00085472can054618-sup-supplementary_table_2.xls]

## Sheet: Sheet1
G2 Biological Processes (List Total = 309, Population Total = 1219)
GO Category	List Hits	Population Hits	p-value
immune response	61	88	1.84136e-19
response to biotic stimulus	67	105	2.352e-18
defense response	61	91	2.66203e-18
response to external stimulus	82	144	4.71081e-18
organismal physiological process	87	164	1.71671e-16
response to stimulus	87	174	2.24789e-14
antigen processing	12	12	5.98564e-08
antigen presentation	11	11	2.4264e-07
skeletal development	15	19	1.2135e-06
response to pest/pathogen/parasite	26	45	2.45122e-06
response to wounding	18	26	2.48223e-06
phosphate transport	11	13	1.13385e-05
inorganic anion transport	13	17	1.24745e-05
antigen presentation, exogenous antigen	8	8	1.59206e-05
antigen processing, exogenous antigen via MHC class II	8	8	1.59206e-05
inflammatory response	10	12	3.89285e-05
innate immune response	10	12	3.89285e-05
development	74	201	5.11262e-05
taxis	8	9	0.000111628
chemotaxis	8	9	0.000111628
organogenesis	45	112	0.000209208
regulation of cellular process	46	117	0.000324643
anion transport	13	21	0.000381243
cell adhesion	34	83	0.000891872
cell communication	103	322	0.00105172
morphogenesis	54	149	0.00106424
muscle development	11	18	0.0012949
cell motility	21	46	0.00184979
response to stress	36	93	0.00215652
I-kappaB kinase/NF-kappaB cascade	10	17	0.00324561
protein kinase cascade	18	39	0.00338731
G2 Cellular Components (List Total = 293, Population Total = 1149)
GO Category	List Hits	Population Hits	p-value
extracellular	79	137	8.78808e-18
extracellular matrix	32	55	1.32544e-07
collagen	11	12	2.38581e-06
lysosome	14	19	1.22886e-05
vacuole	14	19	1.22886e-05
lytic vacuole	14	19	1.22886e-05
integral to plasma membrane	44	105	8.41494e-05
plasma membrane	59	164	0.000840641
membrane	112	364	0.00353183
G2 Molecular Functions (List Total = 317, Population Total = 1238)
GO Category	List Hits	Population Hits	p-value
signal transducer activity	85	212	2.30173e-07
extracellular matrix structural constituent	15	18	3.84376e-07
MHC class II receptor activity	9	9	4.34448e-06
defense/immunity protein activity	10	11	9.25456e-06
receptor activity	44	99	1.66761e-05
insulin-like growth factor binding	8	8	1.72936e-05
growth factor binding	10	12	4.29293e-05
transmembrane receptor activity	21	38	7.29131e-05
antigen binding	7	8	0.000428323
protein binding	88	262	0.000700875
protease inhibitor activity	9	13	0.00112196
endopeptidase inhibitor activity	9	13	0.00112196
calcium ion binding	28	65	0.00122169
collagen binding	6	7	0.00149224
enzyme inhibitor activity	14	26	0.00175637
Supplemental Table 2. GO categories significantly enriched in gene cluster 2 (G2). All GO terms significantly enriched in G2 based on a one-sided Fisher's Exact test with a global (bootstrap) FDR < 0.05 are listed. Population Total: Number of genes in the filtered list of 2177 probe sets annotated to at least one GO category within the specific system (Biological Process/Cellular Component/Molecu…
